# Supplementary material for: Association of Allergic Diseases and Related Conditions with Dietary Fiber Intake in Korean Adults
Source: PubMed Central journal article supplement (PMC7998737; doi:10.3390/ijerph18062889), 2021-03-12
Supplement: ijerph-18-02889-s001.pdf [file ijerph-18-02889-s001.pdf]

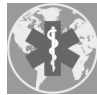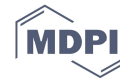

**Table S1.** Baseline characteristics of participants according to the presence of allergic rhinitis, atopic dermatitis and asthma.

| Variables           | Allergic rhinitis             |                                |             | Atopic dermatitis              |                              |             | Asthma                        |                              |             |
|---------------------|-------------------------------|--------------------------------|-------------|--------------------------------|------------------------------|-------------|-------------------------------|------------------------------|-------------|
|                     | No<br>(N <sup>a</sup> =9,147) | Yes<br>(N <sup>a</sup> =1,334) | P-<br>value | No<br>(N <sup>a</sup> =10,034) | Yes<br>(N <sup>a</sup> =447) | P-<br>value | No<br>(N <sup>a</sup> =9,974) | Yes<br>(N <sup>a</sup> =507) | P-<br>value |
| Age                 | 52.18 ± 16.17 <sup>b</sup>    | 42.68 ± 14.39 <sup>b</sup>     | <0.001      | 51.38 ± 16.16 <sup>b</sup>     | 41.81 ± 15.94 <sup>b</sup>   | <0.001      | 50.62 ± 16.15 <sup>b</sup>    | 57.98 ± 17.10 <sup>b</sup>   | <0.001      |
| Sex                 |                               |                                | 0.003       |                                |                              | 0.386       |                               |                              | 0.496       |
| Male                | 3778 (41.3)                   | 494 (37.03)                    |             | 4081 (40.67)                   | 191 (42.73)                  |             | 4058 (40.69)                  | 214 (42.21)                  |             |
| Female              | 5369 (58.7)                   | 840 (62.97)                    |             | 5953 (59.33)                   | 256 (57.27)                  |             | 5916 (59.31)                  | 293 (57.79)                  |             |
| Residency           |                               |                                | <0.001      |                                |                              | <0.001      |                               |                              | 0.304       |
| Urban               | 7015 (76.69)                  | 1158 (86.81)                   |             | 7794 (77.68)                   | 379 (84.79)                  |             | 7787 (78.07)                  | 386 (76.13)                  |             |
| Rural               | 2132 (23.31)                  | 176 (13.19)                    |             | 2240 (22.32)                   | 68 (15.21)                   |             | 2187 (21.93)                  | 121 (23.87)                  |             |
| Household income    |                               |                                | <0.001      |                                |                              | 0.004       |                               |                              | <0.001      |
| <25%                | 2038 (22.48)                  | 142 (10.73)                    |             | 2116 (21.28)                   | 64 (14.41)                   |             | 1987 (20.10)                  | 193 (38.29)                  |             |
| 25–50%              | 2316 (25.55)                  | 337 (25.47)                    |             | 2539 (25.53)                   | 114 (25.68)                  |             | 2535 (25.65)                  | 118 (23.41)                  |             |
| 50–75%              | 2400 (26.48)                  | 451 (34.09)                    |             | 2715 (27.30)                   | 136 (30.63)                  |             | 2745 (27.77)                  | 106 (21.03)                  |             |
| >75%                | 2311 (25.49)                  | 393 (29.71)                    |             | 2574 (25.88)                   | 130 (29.28)                  |             | 2617 (26.48)                  | 87 (17.26)                   |             |
| Smoking             |                               |                                | 0.003       |                                |                              | <0.001      |                               |                              | 0.822       |
| Current smoker      | 7376 (80.76)                  | 1121 (84.22)                   |             | 8164 (81.5)                    | 333 (74.5)                   |             | 8085 (81.18)                  | 412 (81.58)                  |             |
| Ex/non-smoker       | 1757 (19.24)                  | 210 (15.78)                    |             | 1853 (18.5)                    | 114 (25.5)                   |             | 1874 (18.82)                  | 93 (18.42)                   |             |
| Alcohol consumption |                               |                                | <0.001      |                                |                              | 0.015       |                               |                              | 0.026       |
| ≥1 time a month     | 4476 (49.27)                  | 574 (43.52)                    |             | 4861 (48.8)                    | 189 (42.86)                  |             | 4781 (48.30)                  | 269 (53.37)                  |             |
| <1 time a month     | 4608 (50.73)                  | 745 (56.48)                    |             | 5101 (51.2)                    | 252 (57.14)                  |             | 5118 (51.70)                  | 235 (46.63)                  |             |
| Physical activity   |                               |                                | 0.7294      |                                |                              |             |                               |                              | 0.707       |
| >5days/week         | 8235 (90.23)                  | 1196 (89.92)                   |             | 9032 (90.23)                   | 399 (89.26)                  |             | 8978 (90.21)                  | 453 (89.70)                  |             |
| ≤5days/week         | 892 (9.77)                    | 134 (10.08)                    |             | 978 (9.77)                     | 48 (10.74)                   |             | 974 (9.79)                    | 52 (10.30)                   |             |

---

|     |       |      |        |       |       |        |       |       |        |
|-----|-------|------|--------|-------|-------|--------|-------|-------|--------|
| BMI | 23.67 | 23.2 | <0.001 | 23.61 | 23.55 | 0.7459 | 23.59 | 24.02 | 0.0056 |
|-----|-------|------|--------|-------|-------|--------|-------|-------|--------|

<sup>a</sup> number of study population; <sup>b</sup>, mean age ± standard deviation; brackets, percentage of each group population.
